# Supplementary material
Source: PubMed Central journal article supplement (PMC3173231)

## SUPPLEMENTARY DATA

**Fig. S1.** Immunoblot analysis of whole-cell lysates of oocytes expressing  $\alpha\beta\gamma$ -ENaC (WT) or the triply-tagged channel  $\alpha$ HA/FLAG-,  $\beta$ HA/His<sub>6</sub>-, and  $\gamma$ HA/V5-ENaC (3xTag). Oocytes were injected with 0.2 ng cRNA per subunit and incubated in low-sodium solution for two days. Whole-cell lysates of the oocytes were prepared and analyzed by SDS-PAGE followed by immunoblotting, using rabbit polyclonal anti- $\alpha$ - (A), anti- $\beta$ - (B), or anti- $\gamma$ -ENaC antibodies (C). A, the anti- $\alpha$ -ENaC antibody (directed against an epitope at the N-terminus) showed a specific signal for full-length  $\alpha$ -ENaC at 95 kDa and an expected N-terminal furin cleavage fragment at 24 kDa in WT-ENaC and 25 kDa in the triply-tagged ENaC. (The slightly larger size is accounted for by the presence of the N-terminal HA-tag on the  $\alpha$ -subunit). B, the anti- $\beta$ -ENaC antibody (directed against an epitope at the C-terminus) detected a specific band at the full size (98 kDa). This band was stronger in oocytes expressing WT-ENaC compared with the triply-tagged channel, which is in good agreement with the ENaC whole-cell current data (see Fig. 1A, B). C, the anti- $\gamma$ -ENaC antibody (directed against an epitope at the C-terminus) detected a full-length  $\gamma$ -ENaC band at 87 kDa and a C-terminal furin cleavage fragment at 76 kDa. The additional bands detected by the antibodies are also present in lysates of non-injected (NI) oocytes, and are therefore non-specific bands.

**Fig. S2.** Determination of the assembly state of ENaC homomers. A, low-magnification image of  $\beta$ HA/V5-ENaC. B, low-magnification image of  $\gamma$ HA/V5-ENaC. C, low-magnification image of  $\beta$ HA/V5-ENaC that had been incubated with an anti-V5 antibody. Arrowheads indicate singly-decorated particles; the arrow indicates a doubly-decorated particle. D, low-magnification image of  $\gamma$ HA/V5-ENaC that had been incubated with an anti-V5 antibody. Arrowheads indicate singly-decorated particles; the arrow indicates a doubly-decorated particle. Scale bars, 200 nm; shade-height scales, 0-4 nm.

**Fig. S3.** Discrimination between antibodies and Fab fragments. Low-magnification AFM images of anti-His<sub>6</sub> antibodies (A), anti-V5 Fab fragments (B), and a mixture of antibodies and Fab fragments (C). Arrows in (C) indicate antibodies; arrowheads indicate Fab fragments. Scale bars, 200 nm; shade-height scales, 0-4 nm.

**Figure S1**

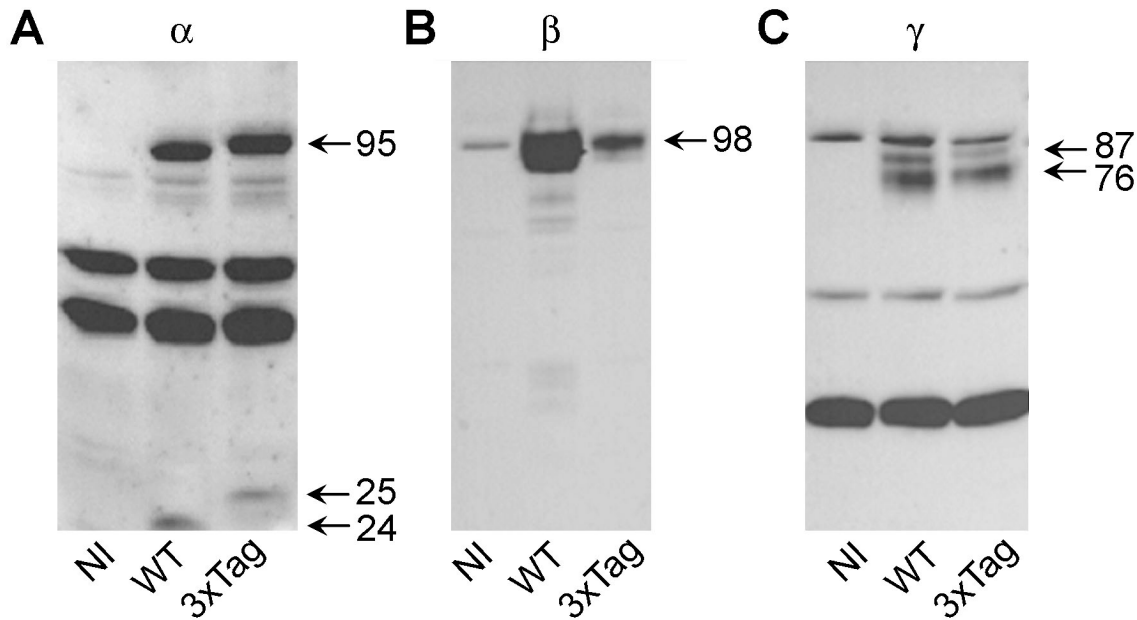

**Figure S2**

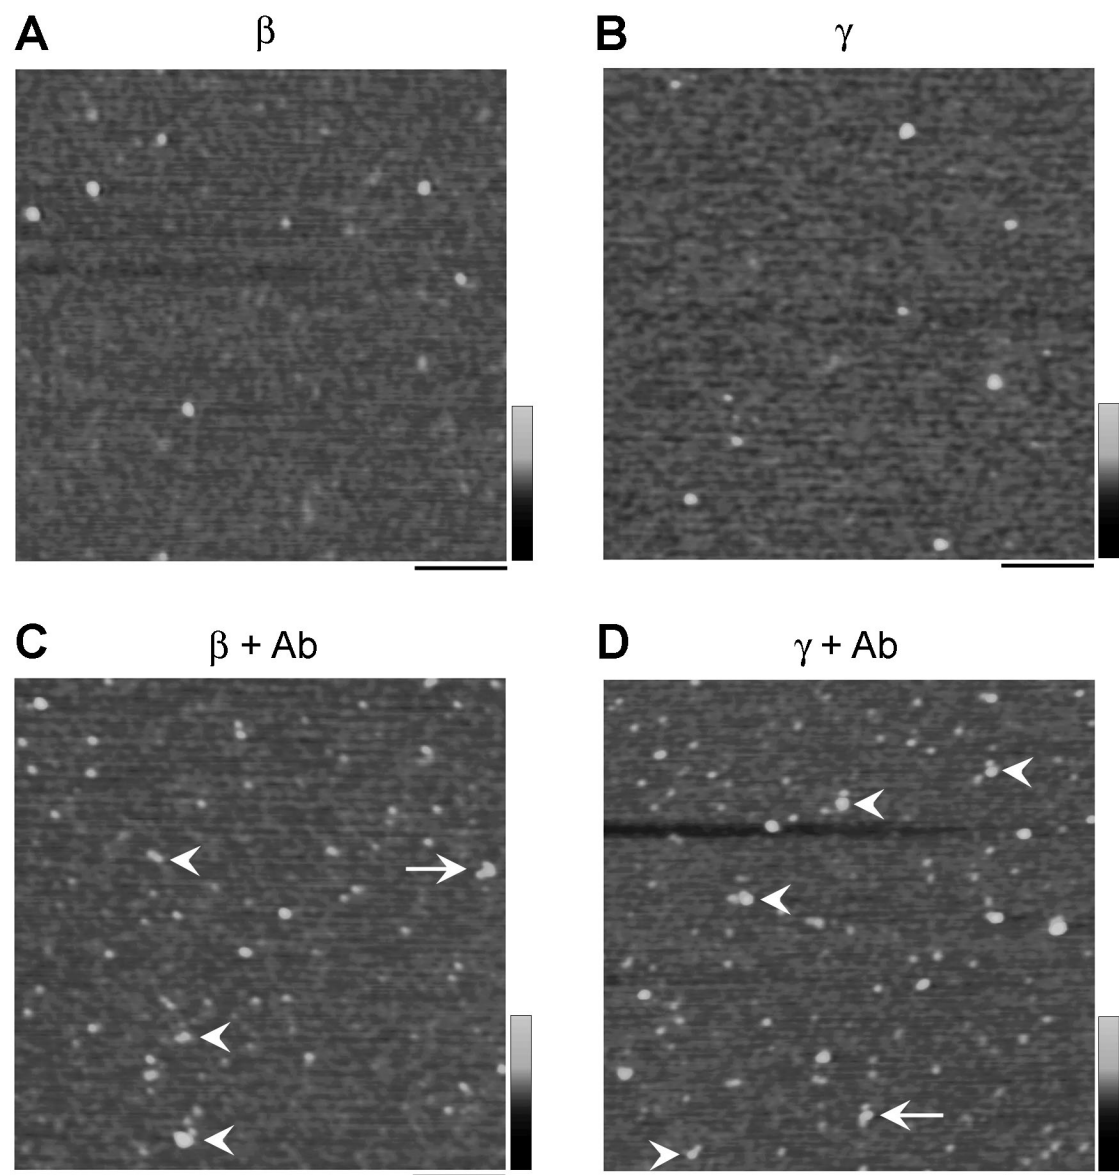

**Figure S3**

**A**

Anti-His<sub>6</sub> Ab

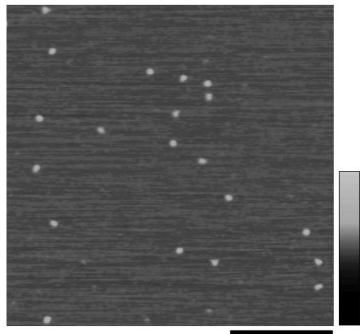

**B**

Anti-V5 Fab

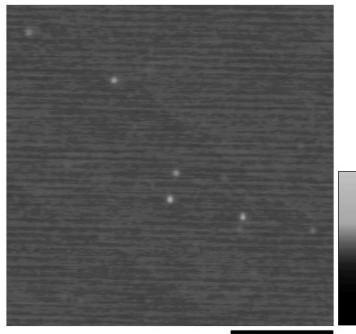

**C**

Ab + Fab

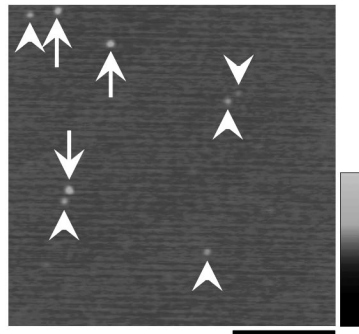

Supplement: supp_M111.275289_jbc.M111.275289-1.pdf [file supp_M111.275289_jbc.M111.275289-1.pdf]
